# Supplementary material for: Novel M. tuberculosis specific IL-2 ELISpot assay discriminates adult patients with active or latent tuberculosis
Source: PubMed Central journal article supplement (PMC5983515; doi:10.1371/journal.pone.0197825), 2018-06-01
Supplement: pone.0197825.s001.pdf [file pone.0197825.s001.pdf]

## ELISpot Supporting information

IL-2 based ELISpot results for each of the active TB, LTBI patients and healthy subjects.

**IL-2 based ELISpot test results for the 215 enrolled patient:** IL-2 based ELISpot test results for the 215 enrolled patients, clustered according to the diagnosis. The values are expressed as mean and interquartile range of SFC per million PBMCs.

|               | <b>Healthy<br/>(n=54)</b> | <b>LTBI<br/>(n=88)</b> | <b>Active TB<br/>(n=73)</b> | <b>P<br/>(Healthy vs<br/>infected)</b> | <b>P<br/>(Latent vs<br/>active disease)</b> |
|---------------|---------------------------|------------------------|-----------------------------|----------------------------------------|---------------------------------------------|
| <b>Ala-DH</b> | 0<br>(0;0)                | 7.5<br>(2.5;10)        | 280<br>(85;1120)            | p≤0.0001                               | p≤0.0001                                    |
| <b>ESAT-6</b> | 2.5<br>(0;17.5)           | 180<br>(30;340)        | 392,5<br>(140;1300)         | p≤0.0001                               | p≤0.0001                                    |
| <b>CFP-10</b> | 0<br>(0;15)               | 192.5<br>(77.5;660)    | 480<br>(325;1590)           | p≤0.0001                               | p≤0.0001                                    |

# ELISpot images and spot number for HEALTHY SUBJECTS (N=54)

| N | Medium (negative control, subtracted) spot/ 0.2 x 10 <sup>6</sup> cell | Medium Pic spot/ 0.2 x 10 <sup>6</sup> cell                                         | Ala-DH pic spot/ 0.2 x 10 <sup>6</sup> cell                                                                                                                                | Ala-DH spot/ 0.2 x 10 <sup>6</sup> cell | Ala-DH spot/ 10 <sup>6</sup> cell | ESAT-6 pic spot/ 0.2 x 10 <sup>6</sup> cell                                                                                                                                  | ESAT-6 spot/ 0.2 x 10 <sup>6</sup> cell | ESAT-6 spot/ 10 <sup>6</sup> cell | CFP-10 pic spot/ 0.2 x 10 <sup>6</sup> cell                                                                                                                                    | CFP-10 spot/ 0.2 x 10 <sup>6</sup> cell | CFP-10 spot/ 10 <sup>6</sup> cell | PHA (positive control) spot/ 0.2 x 10 <sup>6</sup> cell | PHA pic spot/ 0.2 x 10 <sup>6</sup> cell                                              |
|---|------------------------------------------------------------------------|-------------------------------------------------------------------------------------|----------------------------------------------------------------------------------------------------------------------------------------------------------------------------|-----------------------------------------|-----------------------------------|------------------------------------------------------------------------------------------------------------------------------------------------------------------------------|-----------------------------------------|-----------------------------------|--------------------------------------------------------------------------------------------------------------------------------------------------------------------------------|-----------------------------------------|-----------------------------------|---------------------------------------------------------|---------------------------------------------------------------------------------------|
| 1 | 0                                                                      |    | <br>     | 0                                       | 0                                 | <br>     | 0                                       | 0                                 | <br>     | 0                                       | 0                                 | 257                                                     |    |
| 2 | 0                                                                      |    | <br>    | 0                                       | 0                                 | <br>    | 0                                       | 0                                 | <br>    | 0                                       | 0                                 | 105                                                     |    |
| 3 | 0                                                                      |  | <br> | 0                                       | 0                                 | <br> | 0                                       | 0                                 | <br> | 0                                       | 0                                 | 315                                                     |  |
| 4 | 0                                                                      |  |                                                                                         | 0                                       | 0                                 |                                                                                          | 0                                       | 0                                 |                                                                                           | 0                                       | 0                                 | 267                                                     |  |

|   |   |                                                                                     |                                                                                                                                                                            |   |   |                                                                                                                                                                              |   |    |                                                                                                                                                                                |            |    |     |                                                                                       |
|---|---|-------------------------------------------------------------------------------------|----------------------------------------------------------------------------------------------------------------------------------------------------------------------------|---|---|------------------------------------------------------------------------------------------------------------------------------------------------------------------------------|---|----|--------------------------------------------------------------------------------------------------------------------------------------------------------------------------------|------------|----|-----|---------------------------------------------------------------------------------------|
|   |   |                                                                                     |                                                                                            |   |   |                                                                                             |   |    |                                                                                              |            |    |     |                                                                                       |
| 5 | 0 |    | <br>     | 0 | 0 | <br>     | 0 | 0  | <br>     | 0          | 0  | 248 |    |
| 6 | 0 |    | <br>     | 0 | 0 | <br>     | 0 | 0  | <br>     | 0          | 0  | 271 |    |
| 7 | 0 |    | <br>    | 0 | 0 | <br>    | 0 | 0  | <br>    | (1+1)<br>1 | 5  | 265 |    |
| 8 | 0 |  | <br> | 0 | 0 | <br> | 4 | 20 | <br> | (2+2)<br>2 | 10 | 87  |  |
| 9 | 0 |  |                                                                                         | 0 | 0 |                                                                                          | 0 | 0  |                                                                                           | 0          | 0  | 182 |  |

|    |   |                                                                                     |                                                                                                                                                                            |   |   |                                                                                                                                                                              |   |   |                                                                                                                                                                                |   |   |     |                                                                                       |
|----|---|-------------------------------------------------------------------------------------|----------------------------------------------------------------------------------------------------------------------------------------------------------------------------|---|---|------------------------------------------------------------------------------------------------------------------------------------------------------------------------------|---|---|--------------------------------------------------------------------------------------------------------------------------------------------------------------------------------|---|---|-----|---------------------------------------------------------------------------------------|
|    |   |                                                                                     |                                                                                            |   |   |                                                                                             |   |   |                                                                                              |   |   |     |                                                                                       |
| 10 | 0 |    | <br>     | 0 | 0 | <br>     | 0 | 0 | <br>     | 0 | 0 | 194 |    |
| 11 | 0 |    | <br>     | 0 | 0 | <br>     | 0 | 0 | <br>     | 0 | 0 | 292 |    |
| 12 | 0 |    | <br>    | 0 | 0 | <br>    | 0 | 0 | <br>    | 0 | 0 | 270 |    |
| 13 | 0 |  | <br> | 0 | 0 | <br> | 0 | 0 | <br> | 0 | 0 | 201 |  |
| 14 | 0 |  |                                                                                         | 0 | 0 |                                                                                          | 0 | 0 |                                                                                           | 0 | 0 | 215 |  |

|    |   |                                                                                     |                                                                                                                                                                            |   |   |                                                                                                                                                                              |            |    |                                                                                                                                                                                |            |   |     |                                                                                       |
|----|---|-------------------------------------------------------------------------------------|----------------------------------------------------------------------------------------------------------------------------------------------------------------------------|---|---|------------------------------------------------------------------------------------------------------------------------------------------------------------------------------|------------|----|--------------------------------------------------------------------------------------------------------------------------------------------------------------------------------|------------|---|-----|---------------------------------------------------------------------------------------|
|    |   |                                                                                     |                                                                                            |   |   |                                                                                                                                                                              |            |    |                                                                                               |            |   |     |                                                                                       |
| 15 | 0 |    | <br>     | 0 | 0 | <br>     | (3+1)<br>2 | 10 | <br>     | (2+0)<br>1 | 5 | 230 |    |
| 16 | 0 |    | <br>     | 0 | 0 | <br>     | 0          | 0  | <br>     | 0          | 0 | 254 |    |
| 17 | 0 |    | <br>    | 0 | 0 | <br>    | (2+0)<br>1 | 5  | <br>    | 0          | 0 | 296 |    |
| 18 | 0 |  | <br> | 0 | 0 | <br> | 0          | 0  | <br> | 0          | 0 | 208 |  |
| 19 | 0 |  |                                                                                         | 0 | 0 |                                                                                          | 0          | 0  |                                                                                           | 0          | 0 | 217 |  |

|    |   |                                                                                     |                                                                                                                                                                            |   |   |                                                                                                                                                                              |            |   |                                                                                                                                                                                |            |    |     |                                                                                       |
|----|---|-------------------------------------------------------------------------------------|----------------------------------------------------------------------------------------------------------------------------------------------------------------------------|---|---|------------------------------------------------------------------------------------------------------------------------------------------------------------------------------|------------|---|--------------------------------------------------------------------------------------------------------------------------------------------------------------------------------|------------|----|-----|---------------------------------------------------------------------------------------|
|    |   |                                                                                     |                                                                                            |   |   |                                                                                             |            |   |                                                                                              |            |    |     |                                                                                       |
| 20 | 0 |    | <br>     | 0 | 0 | <br>     | 0          | 0 | <br>     | 0          | 0  | 146 |    |
| 21 | 0 |    | <br>     | 0 | 0 | <br>     | 0          | 0 | <br>     | 0          | 0  | 182 |    |
| 22 | 0 |    | <br>    | 0 | 0 | <br>    | 0          | 0 | <br>    | 0          | 0  | 79  |    |
| 23 | 0 |  | <br> | 0 | 0 | <br> | (0+2)<br>1 | 5 | <br> | (2+2)<br>2 | 10 | 197 |  |

|    |   |                                                                                     |                                                                                                                                                                         |              |     |                                                                                                                                                                           |            |    |                                                                                                                                                                             |              |      |     |                                                                                       |
|----|---|-------------------------------------------------------------------------------------|-------------------------------------------------------------------------------------------------------------------------------------------------------------------------|--------------|-----|---------------------------------------------------------------------------------------------------------------------------------------------------------------------------|------------|----|-----------------------------------------------------------------------------------------------------------------------------------------------------------------------------|--------------|------|-----|---------------------------------------------------------------------------------------|
| 24 | 0 |     | <br>   | 0            | 0   | <br>   | (5+7)<br>6 | 30 | <br>   | (4+3)<br>3,5 | 17,5 | 113 |     |
| 25 | 0 |    | <br>  | (1+0)<br>0,5 | 2,5 | <br>  | (4+2)<br>3 | 15 | <br>  | (0+0)<br>0   | 0    | 218 |    |
| 26 | 0 |    | <br> | 0            | 0   | <br> | 0          | 0  | <br> | (0+0)<br>0   | 0    | 296 |    |
| 27 | 0 |  |                                                                                      | 0            | 0   |                                                                                       | 0          | 0  |                                                                                        | (1+0)<br>0,5 | 2,5  | 203 |  |



|    |   |                                                                                     |                                                                                                                                                                            |   |  |                                                                                                                                                                              |              |     |                                                                                                                                                                                |              |      |     |                                                                                       |
|----|---|-------------------------------------------------------------------------------------|----------------------------------------------------------------------------------------------------------------------------------------------------------------------------|---|--|------------------------------------------------------------------------------------------------------------------------------------------------------------------------------|--------------|-----|--------------------------------------------------------------------------------------------------------------------------------------------------------------------------------|--------------|------|-----|---------------------------------------------------------------------------------------|
|    |   |                                                                                     |                                                                                            |   |  |                                                                                             |              |     |                                                                                              |              |      |     |                                                                                       |
| 28 | 0 |    | <br>     | 0 |  | <br>     | (2+1)<br>1,5 | 7,5 | <br>     | (3+1)<br>2   | 10   | 206 |    |
| 29 | 0 |    | <br>     | 0 |  | <br>     | (4+6)<br>5   | 25  | <br>     | (5+4)<br>4,5 | 22,5 | 243 |    |
| 30 | 0 |  | <br> | 0 |  | <br> | 0            | 0   | <br> | (7+5)<br>6   | 30   | 261 |  |



|    |   |                                                                                     |                                                                                       |   |                                                                                      |              |     |                                                                                       |             |    |     |                                                                                       |
|----|---|-------------------------------------------------------------------------------------|---------------------------------------------------------------------------------------|---|--------------------------------------------------------------------------------------|--------------|-----|---------------------------------------------------------------------------------------|-------------|----|-----|---------------------------------------------------------------------------------------|
| 31 | 0 |     |  0    | 0 |     | 0            | 0   |     | (3+11)<br>7 | 35 | 235 |     |
| 32 | 0 |    |  0   | 0 |    | (0+1)<br>0,5 | 2,5 |    | (10+8)<br>9 | 45 | 265 |    |
| 33 | 0 |    |  0  | 0 |   | (1+1)<br>1   | 5   |   | (0+0)<br>0  | 0  | 231 |    |
| 34 | 0 |  |  0 | 0 |  | (3+1)<br>2   | 10  |  | (0+0)<br>0  | 0  | 198 |  |

|    |   |                                                                                     |                                                                                          |  |   |                                                                                      |              |      |                                                                                       |              |     |     |                                                                                       |
|----|---|-------------------------------------------------------------------------------------|------------------------------------------------------------------------------------------|--|---|--------------------------------------------------------------------------------------|--------------|------|---------------------------------------------------------------------------------------|--------------|-----|-----|---------------------------------------------------------------------------------------|
|    |   |                                                                                     |          |  |   |     |              |      |     |              |     |     |                                                                                       |
| 35 | 0 |    | <br>0   |  | 0 |    | (4+3)<br>3,5 | 17,5 |    | (0+0)<br>0   | 0   | 203 |    |
| 36 | 0 |    | <br>0  |  | 0 |   | (6+8)<br>7   | 35   |   | (1+0)<br>0,5 | 2,5 | 295 |    |
| 37 | 0 |  | <br>0 |  | 0 |  | (6+4)<br>5   | 25   |  | (13+9)<br>11 | 55  | 287 |  |

|    |   |                                                                                     |                                                                                     |   |   |                                                                                      |            |   |                                                                                       |              |     |     |                                                                                       |
|----|---|-------------------------------------------------------------------------------------|-------------------------------------------------------------------------------------|---|---|--------------------------------------------------------------------------------------|------------|---|---------------------------------------------------------------------------------------|--------------|-----|-----|---------------------------------------------------------------------------------------|
|    |   |                                                                                     |                                                                                     |   |   |                                                                                      |            |   |                                                                                       |              |     |     |                                                                                       |
|    |   |    |    | 0 |   |    |            |   |    |              |     | 223 |    |
| 38 | 0 |                                                                                     |                                                                                     |   | 0 |                                                                                      | 0          | 0 |                                                                                       | (4+6)<br>5   | 25  |     |                                                                                       |
|    |   |    |    | 0 |   |    |            |   |    |              |     | 243 |    |
| 39 | 0 |                                                                                     |                                                                                     |   | 0 |                                                                                      | (1+1)<br>1 | 5 |                                                                                       | (0+0)<br>0   | 0   |     |                                                                                       |
|    |   |  |  | 0 |   |  |            |   |  |              |     | 252 |  |
| 40 | 0 |                                                                                     |                                                                                     |   | 0 |                                                                                      | (1+1)<br>1 | 5 |                                                                                       | (1+0)<br>0,5 | 2,5 |     |                                                                                       |

|    |   |                                                                                    |                                                                                      |   |                                                                                     |              |      |                                                                                      |              |      |     |                                                                                      |  |
|----|---|------------------------------------------------------------------------------------|--------------------------------------------------------------------------------------|---|-------------------------------------------------------------------------------------|--------------|------|--------------------------------------------------------------------------------------|--------------|------|-----|--------------------------------------------------------------------------------------|--|
|    |   |                                                                                    |                                                                                      |   |                                                                                     |              |      |                                                                                      |              |      |     |                                                                                      |  |
| 41 | 0 |   |  0  | 0 |   | (2+2)<br>2   | 10   |   | (1+1)<br>1   | 5    | 301 |   |  |
| 42 | 0 |   |  0  | 0 |   | (5+3)<br>4   | 20   |   | (1+1)<br>1   | 5    | 297 |   |  |
| 43 | 0 |  |  0 | 0 |  | (6+5)<br>5,5 | 27,5 |  | (7+6)<br>6,5 | 32,5 | 282 |  |  |

|    |   |                                                                                     |                                                                                                  |                                                                                        |                |     |                                                                                       |              |    |     |                                                                                       |
|----|---|-------------------------------------------------------------------------------------|--------------------------------------------------------------------------------------------------|----------------------------------------------------------------------------------------|----------------|-----|---------------------------------------------------------------------------------------|--------------|----|-----|---------------------------------------------------------------------------------------|
| 44 | 0 |     |  0               |  0    | $(5+7)$<br>6   | 30  |    | $(6+8)$<br>7 | 35 | 261 |     |
| 45 | 0 |    |  $(0+1)$<br>0,5 |  2,5 | $(6+8)$<br>7   | 35  |    | $(0+0)$<br>0 | 0  | 204 |    |
| 46 | 0 |    |  0             |  0  | $(1+0)$<br>0,5 | 2,5 |   | $(0+0)$<br>0 | 0  | 215 |    |
| 47 | 0 |  |  0            |  0 | $(1+1)$<br>1   | 5   |  | $(1+1)$<br>1 | 5  | 197 |  |

|    |   |                                                                                     |                                                                                     |   |   |                                                                                      |      |                                                                                       |      |  |  |     |                                                                                       |
|----|---|-------------------------------------------------------------------------------------|-------------------------------------------------------------------------------------|---|---|--------------------------------------------------------------------------------------|------|---------------------------------------------------------------------------------------|------|--|--|-----|---------------------------------------------------------------------------------------|
|    |   | 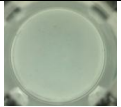   |    | 0 |   |    |      |    |      |  |  | 196 |    |
| 48 | 0 |                                                                                     |                                                                                     | 0 | 0 | (1+0)<br>0,5                                                                         | 2,5  | (2+3)<br>2,5                                                                          | 12,5 |  |  |     |                                                                                       |
|    |   |    |    | 0 |   |    |      |    |      |  |  | 190 |    |
| 49 | 0 |                                                                                     |                                                                                     | 0 | 0 | (1+1)<br>1                                                                           | 5    | (3+2)<br>2,5                                                                          | 12,5 |  |  |     |                                                                                       |
|    |   |  |  | 0 |   |  |      |  |      |  |  | 204 |  |
| 50 | 0 |                                                                                     |                                                                                     | 0 | 0 | (6+7)<br>6,5                                                                         | 32,5 | (4+6)<br>5                                                                            | 25   |  |  |     |                                                                                       |

|    |   |                                                                                     |                                                                                     |   |                                                                                      |              |      |                                                                                       |              |      |     |                                                                                       |
|----|---|-------------------------------------------------------------------------------------|-------------------------------------------------------------------------------------|---|--------------------------------------------------------------------------------------|--------------|------|---------------------------------------------------------------------------------------|--------------|------|-----|---------------------------------------------------------------------------------------|
| 51 | 0 |     |     | 0 |     | (6+5)<br>5,5 | 27,5 |     | (5+8)<br>6,5 | 32,5 | 265 |     |
| 52 | 0 |    |    | 0 |    | (1+0)<br>0,5 | 2,5  |    | (10+6)<br>8  | 40   | 271 |    |
| 53 | 0 |    |   | 0 |   | (5+3)<br>4   | 20   |   | (4+2)<br>3   | 15   | 283 |    |
| 54 | 0 |  |  | 0 |  | (0+2)<br>1   | 0    |  | 0            | 0    | 217 |  |



|  |  |  |  |  |  |  |  |  |  |  |  |  |  |  |
|--|--|--|--|--|--|--|--|--|--|--|--|--|--|--|
|  |  |  |  |  |  |  |  |  |  |  |  |  |  |  |
|--|--|--|--|--|--|--|--|--|--|--|--|--|--|--|

### ELISpot images and spot number for LTBI SUBJECTS (N=88)

| N | Medium (negative control, subtracted) spot/ 0.2 x 10 <sup>6</sup> cell | Medium Pic spot/ 0.2 x 10 <sup>6</sup> cell                                         | Ala-DH pic spot/ 0.2 x 10 <sup>6</sup> cell                                                                                                                                | Ala-DH spot/ 0.2 x 10 <sup>6</sup> cell | Ala-DH spot/ 10 <sup>6</sup> cell | ESAT-6 pic spot/ 0.2 x 10 <sup>6</sup> cell                                                                                                                                  | ESAT-6 spot/ 0.2 x 10 <sup>6</sup> cell | ESAT-6 spot/ 10 <sup>6</sup> cell | CFP-10 pic spot/ 0.2 x 10 <sup>6</sup> cell                                                                                                                                    | CFP-10 spot/ 0.2 x 10 <sup>6</sup> cell | CFP-10 spot/ 10 <sup>6</sup> cell | PHA (positive control) spot/ 0.2 x 10 <sup>6</sup> cell | PHA pic spot/ 0.2 x 10 <sup>6</sup> cell                                              |
|---|------------------------------------------------------------------------|-------------------------------------------------------------------------------------|----------------------------------------------------------------------------------------------------------------------------------------------------------------------------|-----------------------------------------|-----------------------------------|------------------------------------------------------------------------------------------------------------------------------------------------------------------------------|-----------------------------------------|-----------------------------------|--------------------------------------------------------------------------------------------------------------------------------------------------------------------------------|-----------------------------------------|-----------------------------------|---------------------------------------------------------|---------------------------------------------------------------------------------------|
| 1 | 0                                                                      |    | <br>    | (1+1)<br>1                              | 5                                 | <br>    | (24+36)<br>30                           | 150                               | <br>    | (65+55)<br>60                           | 300                               | 178                                                     |    |
| 2 | 0                                                                      |  | <br> | (0+1)<br>0,5                            | 2,5                               | <br> | (3+6)<br>4,5                            | 22,5                              | <br> | (19+12)<br>15,5                         | 77,5                              | 198                                                     |  |
| 3 | 2                                                                      |  |                                                                                         | (2+2)<br>0                              | 0                                 |                                                                                          | (8+8)<br>6                              | 30                                |                                                                                           | (15+13)<br>12                           | 60                                | 214                                                     |  |

|   |   |  |  |  |     |  |  |     |  |  |     |     |  |
|---|---|--|--|--|-----|--|--|-----|--|--|-----|-----|--|
|   |   |  |  |  |     |  |  |     |  |  |     |     |  |
| 4 | 1 |  |  |  | 7,5 |  |  | 290 |  |  | 185 | 195 |  |
|   |   |  |  |  |     |  |  |     |  |  |     |     |  |
|   |   |  |  |  |     |  |  |     |  |  |     |     |  |
| 5 | 0 |  |  |  | 0,5 |  |  | 30  |  |  | 75  | 174 |  |
|   |   |  |  |  |     |  |  |     |  |  |     |     |  |
|   |   |  |  |  |     |  |  |     |  |  |     |     |  |
| 6 | 1 |  |  |  | 10  |  |  | 335 |  |  | 780 | 196 |  |
|   |   |  |  |  |     |  |  |     |  |  |     |     |  |
|   |   |  |  |  |     |  |  |     |  |  |     |     |  |
| 7 | 0 |  |  |  | 2,5 |  |  | 90  |  |  | 122 | 187 |  |
|   |   |  |  |  |     |  |  |     |  |  |     |     |  |
|   |   |  |  |  |     |  |  |     |  |  |     |     |  |
| 8 | 4 |  |  |  | 10  |  |  | 420 |  |  | 650 | 268 |  |
|   |   |  |  |  |     |  |  |     |  |  |     |     |  |
|   |   |  |  |  |     |  |  |     |  |  |     |     |  |

|    |   |                                                                                     |                                                                                                                                                                            |              |     |                                                                                                                                                                              |                      |     |                                                                                                                                                                                |                  |     |     |                                                                                       |
|----|---|-------------------------------------------------------------------------------------|----------------------------------------------------------------------------------------------------------------------------------------------------------------------------|--------------|-----|------------------------------------------------------------------------------------------------------------------------------------------------------------------------------|----------------------|-----|--------------------------------------------------------------------------------------------------------------------------------------------------------------------------------|------------------|-----|-----|---------------------------------------------------------------------------------------|
|    |   |                                                                                     |                                                                                            |              |     |                                                                                             |                      |     |                                                                                              |                  |     |     |                                                                                       |
| 9  | 0 |    | <br>     | (4+0)<br>2   | 10  | <br>     | (57+65)<br>61        | 305 | <br>     | (124+116)<br>112 | 560 | 214 |    |
| 10 | 0 |    | <br>     | (0+0)<br>0   | 0   | <br>     | (68+66)<br>67        | 335 | <br>     | (86+42)<br>64    | 320 | 284 |    |
| 11 | 0 |    | <br>    | (0+0)<br>0   | 0   | <br>    | 0                    | 0   | <br>    | 0                | 0   | 264 |    |
| 12 | 2 |  | <br> | (3+5)<br>2   | 10  | <br> | (105+12<br>7)<br>114 | 570 | <br> | (176+196)<br>184 | 920 | 247 |  |
| 13 | 0 |  |                                                                                         | (1+2)<br>1,5 | 7,5 |                                                                                          | (73+53)<br>63        | 315 |                                                                                           | (107+85)<br>96   | 480 | 256 |  |

|    |   |  |  |              |     |  |               |     |  |                  |     |     |  |
|----|---|--|--|--------------|-----|--|---------------|-----|--|------------------|-----|-----|--|
|    |   |  |  |              |     |  |               |     |  |                  |     |     |  |
| 14 | 0 |  |  | (0+1)<br>0,5 | 2,5 |  | (2+1)<br>1,5  | 7,5 |  | (0+0)<br>0       | 0   | 259 |  |
| 15 | 2 |  |  | (4+4)<br>2   | 10  |  | (82+74)<br>78 | 390 |  | (4+2)<br>1       | 5   | 246 |  |
| 16 | 0 |  |  | (0+0)<br>0   | 0   |  | (95+71)<br>83 | 415 |  | (141+153)<br>147 | 735 | 247 |  |
| 17 | 0 |  |  | (0+0)<br>0   | 0   |  | (3+3)<br>3    | 15  |  | (175+167)<br>171 | 835 | 283 |  |
| 18 | 0 |  |  | (2+2)<br>2   | 10  |  | (0+0)<br>0    | 0   |  | (0+0)<br>0       | 0   | 291 |  |



|    |   |                                                                                     |                                                                                                                                                                            |              |     |                                                                                                                                                                              |                  |     |                                                                                                                                                                                |                  |       |        |                                                                                       |
|----|---|-------------------------------------------------------------------------------------|----------------------------------------------------------------------------------------------------------------------------------------------------------------------------|--------------|-----|------------------------------------------------------------------------------------------------------------------------------------------------------------------------------|------------------|-----|--------------------------------------------------------------------------------------------------------------------------------------------------------------------------------|------------------|-------|--------|---------------------------------------------------------------------------------------|
|    |   |                                                                                     |                                                                                            |              |     |                                                                                             |                  |     |                                                                                              |                  |       |        |                                                                                       |
| 19 | 0 |    | <br>     | (0+0)<br>0   | 0   | <br>     | (67+63)<br>65    | 325 | <br>     | (0+0)<br>0       | 0     | 304    |    |
| 20 | 0 |    | <br>     | (0+0)<br>0   | 10  | <br>     | (90+86)<br>88    | 440 | <br>     | (86+112)<br>99   | 495   | 315    |    |
| 21 | 0 |    | <br>    | (0+0)<br>0   | 0   | <br>    | (25+23)<br>24    | 120 | <br>    | (116+124)<br>120 | 600   | 305    |    |
| 22 | 0 |  | <br> | (0+1)<br>0,5 | 2,5 | <br> | (28+26)<br>27    | 135 | <br> | (30+33)<br>31,5  | 157,5 | 285270 |  |
| 23 | 4 |  |                                                                                         | (6+6)<br>2   | 10  |                                                                                          | (154+16<br>2)154 | 770 |                                                                                           | (20+60)<br>36    | 180   |        |  |

|    |   |                                                                                     |                                                                                                                                                                            |            |    |                                                                                                                                                                              |               |     |                                                                                                                                                                                |                  |       |     |                                                                                       |
|----|---|-------------------------------------------------------------------------------------|----------------------------------------------------------------------------------------------------------------------------------------------------------------------------|------------|----|------------------------------------------------------------------------------------------------------------------------------------------------------------------------------|---------------|-----|--------------------------------------------------------------------------------------------------------------------------------------------------------------------------------|------------------|-------|-----|---------------------------------------------------------------------------------------|
|    |   |                                                                                     |                                                                                            |            |    |                                                                                             |               |     |                                                                                              |                  |       |     |                                                                                       |
| 24 | 0 |    | <br>     | (1+3)<br>2 | 10 | <br>     | (81+79)<br>80 | 400 | <br>     | (45+30)<br>37,5  | 187,5 | 292 |    |
| 25 | 0 |    | <br>     | (2+2)<br>2 | 10 | <br>     | (3+9)<br>6    | 30  | <br>     | (15+16)<br>15,5  | 77,5  | 284 |    |
| 26 | 0 |    | <br>    | (0+0)<br>0 | 0  | <br>    | (8+8)<br>8    | 40  | <br>    | (8+14)<br>11     | 55    | 306 |    |
| 27 | 0 |  | <br> | (0+0)<br>0 | 0  | <br> | (87+85)<br>86 | 430 | <br> | (379+55)<br>217  | 1085  | 312 |  |
| 28 | 0 |  |                                                                                         | (0+0)<br>0 | 0  |                                                                                          | (0+0)<br>0    | 0   |                                                                                           | (194+158)<br>176 | 880   | 295 |  |

|    |   |                                                                                     |                                                                                                                                                                            |              |     |                                                                                                                                                                              |                 |     |                                                                                                                                                                                |                |       |     |                                                                                       |
|----|---|-------------------------------------------------------------------------------------|----------------------------------------------------------------------------------------------------------------------------------------------------------------------------|--------------|-----|------------------------------------------------------------------------------------------------------------------------------------------------------------------------------|-----------------|-----|--------------------------------------------------------------------------------------------------------------------------------------------------------------------------------|----------------|-------|-----|---------------------------------------------------------------------------------------|
|    |   |                                                                                     |                                                                                            |              |     |                                                                                             |                 |     |                                                                                              |                |       |     |                                                                                       |
| 29 | 0 |    | <br>     | (0+0)<br>0   | 0   | <br>     | (60+56)<br>58   | 290 | <br>     | (0+0)<br>0     | 0     | 271 |    |
| 30 | 0 |    | <br>     | (4+0)<br>2   | 10  | <br>     | (60+65)<br>62,2 | 311 | <br>     | (2+0)<br>1     | 5     | 276 |    |
| 31 | 0 |    | <br>    | (0+1)<br>0,5 | 2,5 | <br>    | (0+1)<br>0,5    | 2,5 | <br>    | (4+10)<br>7    | 35    | 325 |    |
| 32 | 0 |  | <br> | (1+1)<br>1   | 5   | <br> | (2+2)<br>2      | 10  | <br> | (17+11)<br>14  | 70    | 294 |  |
| 33 | 0 |  |                                                                                         | (1+1)<br>1   | 5   |                                                                                          | (85+79)<br>82   | 410 |                                                                                           | (40+5)<br>22,5 | 112,5 | 283 |  |



|    |   |                                                                                     |                                                                                                                                                                            |            |    |                                                                                                                                                                              |                |     |                                                                                                                                                                                |                  |     |     |                                                                                       |
|----|---|-------------------------------------------------------------------------------------|----------------------------------------------------------------------------------------------------------------------------------------------------------------------------|------------|----|------------------------------------------------------------------------------------------------------------------------------------------------------------------------------|----------------|-----|--------------------------------------------------------------------------------------------------------------------------------------------------------------------------------|------------------|-----|-----|---------------------------------------------------------------------------------------|
|    |   |                                                                                     | 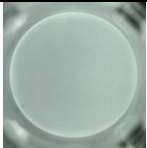                                                                                           |            |    |                                                                                             |                |     |                                                                                              |                  |     |     |                                                                                       |
| 34 | 0 |    | <br>     | (1+1)<br>1 | 5  | <br>     | (13+9)<br>11   | 55  | <br>     | (38+14)<br>26    | 130 | 306 |    |
| 35 | 0 |    | <br>     | (0+2)<br>1 | 5  | <br>     | (15+13)<br>14  | 70  | <br>     | (32+28)<br>30    | 150 | 307 |    |
| 36 | 0 |    | <br>    | (2+2)<br>2 | 10 | <br>    | (100+94)<br>97 | 486 | <br>    | (124+164)<br>144 | 720 | 289 |    |
| 37 | 0 |  | <br> | (0+4)<br>2 | 10 | <br> | (69+65)<br>67  | 335 | <br> | (190+194)<br>192 | 960 | 321 |  |

|    |   |                                                                                     |                                                                                     |              |     |                                                                                      |                 |       |                                                                                       |                  |      |     |                                                                                       |
|----|---|-------------------------------------------------------------------------------------|-------------------------------------------------------------------------------------|--------------|-----|--------------------------------------------------------------------------------------|-----------------|-------|---------------------------------------------------------------------------------------|------------------|------|-----|---------------------------------------------------------------------------------------|
| 38 | 0 |     |     | (0+0)<br>0   | 0   |     | (76+68)<br>72   | 370   |     | (237+223)<br>230 | 1150 | 310 |     |
| 39 | 0 |    |    | (0+1)<br>0,5 | 2,5 |    | (1+1)<br>1      | 5     |    | (0+0=<br>0       | 0    | 297 |    |
| 40 | 0 |   |   | (0+1)<br>0,5 | 2,5 |   | (3+3)<br>83     | 15    |   | (2+2)<br>2       | 10   | 304 |    |
| 41 | 5 |  |  | (6+8)<br>2   | 10  |  | (93+90)<br>86,5 | 432,5 |  | (201+69)<br>130  | 650  | 317 |  |

|    |   |                                                                                     |                                                                                                                                                                            |            |    |                                                                                                                                                                              |                |     |                                                                                                                                                                                |                  |      |     |                                                                                       |
|----|---|-------------------------------------------------------------------------------------|----------------------------------------------------------------------------------------------------------------------------------------------------------------------------|------------|----|------------------------------------------------------------------------------------------------------------------------------------------------------------------------------|----------------|-----|--------------------------------------------------------------------------------------------------------------------------------------------------------------------------------|------------------|------|-----|---------------------------------------------------------------------------------------|
| 42 | 0 |     | <br>      | (2+2)<br>2 | 10 | <br>      | (105+87)<br>96 | 480 | <br>      | (0+0)<br>0       | 0    | 282 |     |
| 43 | 0 |    | <br>     | (2+2)<br>2 | 10 | <br>     | (63+55)<br>59  | 295 | <br>     | (23+43)<br>38    | 190  | 279 |    |
| 44 | 0 |    | <br>     | (0+0)<br>0 | 0  | <br>     | (1+1)<br>1     | 5   | <br>     | (133+379)<br>256 | 1280 | 289 |    |
| 45 | 0 |   | <br>  | (1+1)<br>1 | 5  | <br>  | (4+6)<br>5     | 25  | <br>  | (18+58)<br>38    | 190  | 298 |   |
| 46 | 0 |  | <br> | (1+1)<br>1 | 5  | <br> | (5+7)<br>6     | 30  | <br> | (63+39)<br>56    | 280  | 301 |  |

|    |   |                                                                                     |                                                                                                                                                                            |              |     |                                                                                                                                                                              |                 |       |                                                                                                                                                                                |                  |     |     |                                                                                       |
|----|---|-------------------------------------------------------------------------------------|----------------------------------------------------------------------------------------------------------------------------------------------------------------------------|--------------|-----|------------------------------------------------------------------------------------------------------------------------------------------------------------------------------|-----------------|-------|--------------------------------------------------------------------------------------------------------------------------------------------------------------------------------|------------------|-----|-----|---------------------------------------------------------------------------------------|
| 47 | 0 |     | <br>      | 1+1<br>1     | 5   | <br>      | (96+88)<br>92   | 477,5 | <br>      | (1+5)<br>3       | 15  | 304 |     |
| 48 | 0 |    | <br>     | (1+1)<br>1   | 5   | <br>     | (99+105)<br>102 | 510   | <br>     | (201+133)<br>167 | 835 | 300 |    |
| 49 | 0 |    | <br>     | (1+2)<br>1,5 | 7,5 | <br>     | (11+7)<br>9     | 45    | <br>     | (159+209)<br>184 | 920 | 287 |    |
| 50 | 0 |   | <br>  | (0+4)<br>2   | 10  | <br>  | (18+13)<br>15,5 | 77,5  | <br>  | (0+0)<br>0       | 0   | 288 |   |
| 51 | 0 |  | <br> | (2+2)<br>2   | 10  | <br> | (21+27)<br>24   | 120   | <br> | (207+85)<br>146  | 730 | 297 |  |



|    |   |                                                                                     |                                                                                                                                                                            |              |     |                                                                                                                                                                              |               |      |                                                                                                                                                                                |                    |        |     |                                                                                       |
|----|---|-------------------------------------------------------------------------------------|----------------------------------------------------------------------------------------------------------------------------------------------------------------------------|--------------|-----|------------------------------------------------------------------------------------------------------------------------------------------------------------------------------|---------------|------|--------------------------------------------------------------------------------------------------------------------------------------------------------------------------------|--------------------|--------|-----|---------------------------------------------------------------------------------------|
| 52 | 0 |     | <br>      | (0+0)<br>0   | 0   | <br>      | (1+0)<br>0,5  | 2,5  | <br>      | (80+76)<br>78      | 390    | 321 |     |
| 53 | 2 |    | <br>     | (3+2)<br>0,5 | 2,5 | <br>     | (69+65)<br>66 | 330  | <br>     | (78+44)<br>59      | 295    | 248 |    |
| 54 | 0 |    | <br>     | (0+0)<br>0   | 0   | <br>     | (81+79)<br>80 | 400  | <br>     | (0+0)<br>0         | 0      | 231 |    |
| 55 | 0 |   | <br>  | (2+2)<br>2   | 10  | <br>  | (4+2)<br>3    | 15   | <br>  | (13+43)<br>28      | 140    | 287 |   |
| 56 | 0 |  | <br> | (2+2)<br>2   | 10  | <br> | (4+5)<br>4,5  | 22,5 | <br> | (201+218)<br>209,5 | 1047,5 | 275 |  |

|    |   |                                                                                     |                                                                                                                                                                            |              |     |                                                                                                                                                                              |                 |       |                                                                                                                                                                                |                  |      |     |                                                                                       |
|----|---|-------------------------------------------------------------------------------------|----------------------------------------------------------------------------------------------------------------------------------------------------------------------------|--------------|-----|------------------------------------------------------------------------------------------------------------------------------------------------------------------------------|-----------------|-------|--------------------------------------------------------------------------------------------------------------------------------------------------------------------------------|------------------|------|-----|---------------------------------------------------------------------------------------|
| 57 | 0 |     | <br>      | (2+2)<br>2   | 10  | <br>      | (61+50)<br>55,5 | 277,5 | <br>      | (260+224)<br>242 | 1210 | 249 |     |
| 58 | 0 |    | <br>     | (2+2)<br>2   | 10  | <br>     | (63+61)<br>62   | 310   | <br>     | (32+42)<br>37    | 185  | 197 |    |
| 59 | 0 |    | <br>     | (2+2)<br>2   | 10  | <br>     | (76+78)<br>77   | 385   | <br>     | (32+46)<br>39    | 195  | 224 |    |
| 60 | 0 |   | <br>  | (0+2)<br>1   | 5   | <br>  | (101+97)<br>99  | 495   | <br>  | (232+240)<br>236 | 1180 | 302 |   |
| 61 | 0 |  | <br> | (2+1)<br>1,5 | 7,5 | <br> | (8+8)<br>8      | 40    | <br> | (223+175)<br>199 | 995  | 300 |  |

|    |   |                                                                                     |                                                                                     |              |     |                                                                                      |               |     |                                                                                       |                 |       |     |                                                                                       |
|----|---|-------------------------------------------------------------------------------------|-------------------------------------------------------------------------------------|--------------|-----|--------------------------------------------------------------------------------------|---------------|-----|---------------------------------------------------------------------------------------|-----------------|-------|-----|---------------------------------------------------------------------------------------|
| 62 | 0 |     |     | (2+2)<br>2   | 10  |     | (11+13)<br>12 | 60  |     | (16+20)<br>18   | 90    | 197 |     |
| 63 | 0 |    |    | (0+1)<br>0,5 | 2,5 |    | (1+1)<br>1    | 5   |    | (28+42)<br>35   | 175   | 277 |    |
| 64 | 0 |    |    | (0+0)<br>0   | 0   |    | (63+57)<br>60 | 300 |    | (28+40)<br>34   | 170   | 265 |    |
| 65 | 0 |   |   | (0+1)<br>1   | 5   |   | (55+57)<br>56 | 280 |   | (35+41)<br>38   | 190   | 301 |   |
| 66 | 0 |  |  | (2+1)<br>1,5 | 7,5 |  | (0+1)<br>1    | 5   |  | (55+34)<br>44,5 | 222,5 | 283 |  |



|    |   |                                                                                     |                                                                                                                                                                            |              |     |                                                                                                                                                                              |               |     |                                                                                                                                                                                |                  |      |     |                                                                                       |
|----|---|-------------------------------------------------------------------------------------|----------------------------------------------------------------------------------------------------------------------------------------------------------------------------|--------------|-----|------------------------------------------------------------------------------------------------------------------------------------------------------------------------------|---------------|-----|--------------------------------------------------------------------------------------------------------------------------------------------------------------------------------|------------------|------|-----|---------------------------------------------------------------------------------------|
| 67 | 0 |     | <br>      | (1+2)<br>1,5 | 7,5 | <br>      | (6+6)<br>6    | 30  | <br>      | (240+178)<br>209 | 1045 | 265 |     |
| 68 | 0 |    | <br>     | (0+2)<br>2   | 10  | <br>     | (30+12)<br>21 | 105 | <br>     | (121+245)<br>183 | 915  | 317 |    |
| 69 | 0 |    | <br>     | (2+2)<br>2   | 10  | <br>     | (93+91)<br>92 | 460 | <br>     | (128+140)<br>134 | 670  | 302 |    |
| 70 | 0 |   | <br>  | (2+2)<br>2   | 10  | <br>  | (69+69)<br>69 | 345 | <br>  | (4+2)<br>3       | 15   | 198 |   |
| 71 | 0 |  | <br> | (2+0)<br>2   | 10  | <br> | (69+59)<br>64 | 320 | <br> | (92+140)<br>116  | 580  | 304 |  |

|    |   |                                                                                     |                                                                                                                                                                            |              |     |                                                                                                                                                                              |                 |       |                                                                                                                                                                                |                   |       |     |                                                                                       |
|----|---|-------------------------------------------------------------------------------------|----------------------------------------------------------------------------------------------------------------------------------------------------------------------------|--------------|-----|------------------------------------------------------------------------------------------------------------------------------------------------------------------------------|-----------------|-------|--------------------------------------------------------------------------------------------------------------------------------------------------------------------------------|-------------------|-------|-----|---------------------------------------------------------------------------------------|
| 72 | 0 |     | <br>      | (0+0)<br>0   | 0   | <br>      | (66+66)<br>66   | 330   | <br>      | (98+88)<br>93     | 465   | 315 |     |
| 73 | 0 |    | <br>     | (0+1)<br>0,5 | 2,5 | <br>     | (3+5)<br>4      | 20    | <br>     | (119+82)<br>100,5 | 502,5 | 321 |    |
| 74 | 0 |    | <br>     | (2+2)<br>2   | 10  | <br>     | (4+6)<br>5      | 25    | <br>     | (2+4)<br>3        | 15    | 294 |    |
| 75 | 0 |   | <br>  | (0+2)<br>1   | 5   | <br>  | (85+74)<br>79,5 | 397,5 | <br>  | (11+13)<br>12     | 60    | 195 |   |
| 76 | 0 |  | <br> | (1+0)<br>1,5 | 7,5 | <br> | (6+7)<br>6,5    | 32,5  | <br> | (21+31)<br>26     | 130   | 239 |  |

|    |   |                                                                                     |                                                                                     |              |     |                                                                                      |               |     |                                                                                       |                  |      |     |                                                                                       |
|----|---|-------------------------------------------------------------------------------------|-------------------------------------------------------------------------------------|--------------|-----|--------------------------------------------------------------------------------------|---------------|-----|---------------------------------------------------------------------------------------|------------------|------|-----|---------------------------------------------------------------------------------------|
| 77 | 0 |     |     | (1+3)<br>2   | 10  |     | (27+23)<br>25 | 125 |     | (135+277)<br>206 | 1030 | 298 |     |
| 78 | 0 |    |    | (2+2)<br>2   | 10  |    | (29+27)<br>28 | 140 |    | (21+23)<br>22    | 110  | 312 |    |
| 79 | 2 |    |    | (5+3)<br>2   | 10  |    | (54+60)<br>55 | 275 |    | (21+45)<br>31    | 155  | 324 |    |
| 80 | 0 |   |   | (0+1)<br>0,5 | 2,5 |   | (5+7)<br>6    | 30  |   | (30+40)<br>35    | 175  | 315 |   |
| 81 | 0 |  |  | (3+1)<br>2   | 10  |  | (62+68)<br>65 | 325 |  | (30+46)<br>38    | 190  | 265 |  |

|    |   |                                                                                     |                                                                                                                                                                            |              |     |                                                                                                                                                                              |                 |       |                                                                                                                                                                                |                  |     |     |                                                                                       |
|----|---|-------------------------------------------------------------------------------------|----------------------------------------------------------------------------------------------------------------------------------------------------------------------------|--------------|-----|------------------------------------------------------------------------------------------------------------------------------------------------------------------------------|-----------------|-------|--------------------------------------------------------------------------------------------------------------------------------------------------------------------------------|------------------|-----|-----|---------------------------------------------------------------------------------------|
| 82 | 1 |     | <br>      | (3+3)<br>2   | 10  | <br>      | (43+41)<br>42   | 210   | <br>      | (63+23)<br>42    | 210 | 387 |     |
| 83 | 0 |    | <br>     | (2+1)<br>1,5 | 7,5 | <br>     | (43+61)<br>52   | 260   | <br>     | (101+149)<br>125 | 625 | 221 |    |
| 84 | 0 |    | <br>     | (1+0)<br>0,5 | 2,5 | <br>     | ( 51+55)<br>53  | 265   | <br>     | (68+150)<br>109  | 545 | 236 |    |
| 85 | 0 |   | <br>  | (2+2)<br>2   | 10  | <br>  | (26+30)<br>+28  | 140   | <br>  | (58+120)<br>89   | 445 | 285 |   |
| 86 | 0 |  | <br> | (0+4)<br>2   | 10  | <br> | (28+23)<br>25,5 | 127,5 | <br> | (51+37)<br>44    | 220 | 273 |  |



|    |   |                                                                                   |                                                                                   |            |    |                                                                                    |               |     |                                                                                     |               |     |     |                                                                                     |
|----|---|-----------------------------------------------------------------------------------|-----------------------------------------------------------------------------------|------------|----|------------------------------------------------------------------------------------|---------------|-----|-------------------------------------------------------------------------------------|---------------|-----|-----|-------------------------------------------------------------------------------------|
| 87 | 0 |  |   | (2+2)<br>2 | 10 |   | (28+32)<br>30 | 150 |   | (48+86)<br>67 | 335 | 300 |   |
| 88 | 0 |  |  | (1+3)<br>2 | 10 |  | (63+29)<br>51 | 255 |  | (99+79)<br>89 | 445 | 285 |  |

### ELISpot images and spot number for ACTIVE TB PATIENTS (N=73)

| N | Medium (negative control, subtracted) spot/ 0.2 x 10 <sup>6</sup> cell | Medium Pic spot/ 0.2 x 10 <sup>6</sup> cell                                         | Ala-DH pic spot/ 0.2 x 10 <sup>6</sup> cell                                         | Ala-DH spot/ 0.2 x 10 <sup>6</sup> cell | Ala-DH spot/ 10 <sup>6</sup> cell | ESAT-6 pic spot/ 0.2 x 10 <sup>6</sup> cell                                          | ESAT-6 spot/ 0.2 x 10 <sup>6</sup> cell | ESAT-6 spot/ 10 <sup>6</sup> cell | CFP-10 pic spot/ 0.2 x 10 <sup>6</sup> cell                                           | CFP-10 spot/ 0.2 x 10 <sup>6</sup> cell | CFP-10 spot/ 10 <sup>6</sup> cell | PHA (positive control) spot/ 0.2 x 10 <sup>6</sup> cell             | PHA (positive control) spot/ 0.2 x 10 <sup>6</sup> cell                               |
|---|------------------------------------------------------------------------|-------------------------------------------------------------------------------------|-------------------------------------------------------------------------------------|-----------------------------------------|-----------------------------------|--------------------------------------------------------------------------------------|-----------------------------------------|-----------------------------------|---------------------------------------------------------------------------------------|-----------------------------------------|-----------------------------------|---------------------------------------------------------------------|---------------------------------------------------------------------------------------|
| 1 | 0                                                                      |  |  | (35+15)<br>25                           | 125                               |  | (69+69)<br>69                           | 345                               |  | (76+79)<br>77,5                         | 387,5                             | The number of spots is over the maximum number of detectable spots. |  |



|   |   |                                                                                     |                                                                                     |                       |     |                                                                                      |                       |       |                                                                                       |                  |     |     |                                                                                       |
|---|---|-------------------------------------------------------------------------------------|-------------------------------------------------------------------------------------|-----------------------|-----|--------------------------------------------------------------------------------------|-----------------------|-------|---------------------------------------------------------------------------------------|------------------|-----|-----|---------------------------------------------------------------------------------------|
| 2 | 1 |    |     | (18+12)<br>)<br>14    | 70  |     | (24)<br>24            | 120   |     | (15+35)<br>24    | 120 | 275 |     |
| 3 | 2 |    |    | (59+57)<br>)<br>56    | 280 |    | (87+105)<br>)<br>94   | 470   |    | (118+134)<br>124 | 620 | 254 |    |
| 4 | 3 |    |    | (172+166)<br>)<br>166 | 830 |    | (162+200)<br>)<br>178 | 890,5 |    | (188+208)<br>195 | 975 | 271 |    |
| 5 | 1 |   |   | (72+74)<br>)<br>72    | 360 |   | (83+76)<br>78,5       | 392,5 |   | (102+92)<br>96   | 480 | 378 |   |
| 6 | 0 |  |  | (17+19)<br>)<br>18    | 90  |  | (29+27)<br>28         | 140   |  | (66+64)<br>65    | 325 | 263 |  |

|    |   |                                                                                     |                                                                                                                                                                            |              |      |                                                                                                                                                                             |              |        |                                                                                                                                                                                |              |      |                                                                     |                                                                                       |
|----|---|-------------------------------------------------------------------------------------|----------------------------------------------------------------------------------------------------------------------------------------------------------------------------|--------------|------|-----------------------------------------------------------------------------------------------------------------------------------------------------------------------------|--------------|--------|--------------------------------------------------------------------------------------------------------------------------------------------------------------------------------|--------------|------|---------------------------------------------------------------------|---------------------------------------------------------------------------------------|
| 7  | 1 | 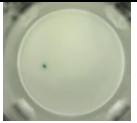    | <br>      | (219+231)224 | 1120 | <br>     | (301+289)294 | 1470   | <br>      | (332+312)321 | 1605 | 279                                                                 |     |
| 8  | 2 |    | <br>     | (272+252)260 | 1300 | <br>    | (322+318)318 | 1590,5 | <br>     | (339+333)334 | 1670 | 275                                                                 |    |
| 9  | 1 |    | <br>     | (16+16)15    | 75   | <br>    | (24+17)19,5  | 97     | <br>     | (64+50)56    | 280  | The number of spots is over the maximum number of detectable spots. |    |
| 10 | 2 |   | <br>  | (240+256)246 | 1230 | <br> | (256+268)260 | 1300   | <br>  | (331+309)318 | 1590 | The number of spots is over the maximum number of detectable spots. |   |
| 11 | 0 |  | <br> | (0+2)1       | 5    |                                                                                         | (3+1)2       | 10     | <br> | (6+6)6       | 30   | 294                                                                 |  |

|    |   |                                                                                     |                                                                                     |                      |      |                                                                                      |                      |      |                                                                                       |                  |      |     |                                                                                       |
|----|---|-------------------------------------------------------------------------------------|-------------------------------------------------------------------------------------|----------------------|------|--------------------------------------------------------------------------------------|----------------------|------|---------------------------------------------------------------------------------------|------------------|------|-----|---------------------------------------------------------------------------------------|
|    |   |                                                                                     |                                                                                     |                      |      | 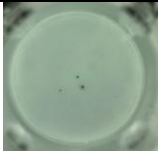    |                      |      |                                                                                       |                  |      |     |                                                                                       |
| 12 | 0 |    |    | (7+7)<br>7           | 35   |    | (253+22<br>1)<br>237 | 1185 |    | (328+308)<br>318 | 1590 | 306 |    |
| 13 | 0 |    |    | (8+12)<br>10         | 50   |    | (286+30<br>8)<br>297 | 1485 |    | (404+400)<br>402 | 2010 | 300 |    |
| 14 | 0 |    |   | (36+36<br>)<br>36    | 180  |   | (56+65)<br>58        | 290  |   | (86+98)<br>92    | 460  | 288 |    |
| 15 | 0 |  |  | (320+1<br>90)<br>255 | 1275 |  | (1+1)<br>1           | 5    |  | (92+72)<br>82    | 410  | 243 |  |

|    |   |                                                                                     |                                                                                     |                      |      |                                                                                      |                      |      |                                                                                       |                  |      |     |                                                                                       |
|----|---|-------------------------------------------------------------------------------------|-------------------------------------------------------------------------------------|----------------------|------|--------------------------------------------------------------------------------------|----------------------|------|---------------------------------------------------------------------------------------|------------------|------|-----|---------------------------------------------------------------------------------------|
| 16 | 3 |     |     | (200+3<br>20)<br>260 | 1300 |     | (3+5)<br>1           | 5    |     | (31+35)<br>30    | 150  | 225 |     |
| 17 | 0 |    |    | (6+4)<br>5           | 25   |    | (29+35)<br>32        | 160  |    | (412+434)<br>423 | 2115 | 284 |    |
| 18 | 0 |    |    | (0+0)<br>0           | 0    |   | (70+66)<br>68        | 340  |    | (381+353)<br>367 | 1835 | 299 |    |
| 19 | 0 |  |  | (86+20<br>)<br>53    | 25   |  | (87+71)<br>79        | 395  |  | (300+338)<br>319 | 1595 | 202 |  |
| 20 | 0 |  |  | (209+2<br>31)<br>220 | 1100 |  | (391+38<br>3)<br>387 | 1935 |  | (1+1)<br>1       | 5    | 286 |  |



|    |   |                                                                                     |                                                                                                                                                                            |                    |        |                                                                                                                                                                              |                  |      |                                                                                                                                                                                |                  |       |     |                                                                                       |
|----|---|-------------------------------------------------------------------------------------|----------------------------------------------------------------------------------------------------------------------------------------------------------------------------|--------------------|--------|------------------------------------------------------------------------------------------------------------------------------------------------------------------------------|------------------|------|--------------------------------------------------------------------------------------------------------------------------------------------------------------------------------|------------------|-------|-----|---------------------------------------------------------------------------------------|
|    |   |                                                                                     | 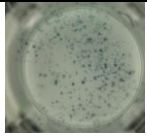                                                                                           |                    |        |                                                                                             |                  |      |                                                                                              |                  |       |     |                                                                                       |
| 21 | 0 |    | <br>     | (40+60)<br>50      | 250    | <br>     | (395+369)<br>382 | 1910 | <br>     | (1+1)<br>1       | 5     | 213 |    |
| 22 | 0 |    | <br>     | (12+14)<br>13      | 65     | <br>     | (12+19)<br>15,5  | 77,5 | <br>     | (38+28)<br>33    | 165   | 304 |    |
| 23 | 0 |   | <br>  | (264+302)<br>283   | 1415   | <br>  | (20+24)<br>22    | 110  | <br>  | (78+86)<br>82    | 410   | 316 |   |
| 24 | 0 |  | <br> | (266+277)<br>271,5 | 1357,5 | <br> | (67+53)<br>60    | 300  | <br> | (100+71)<br>85,5 | 427,5 | 327 |  |



|    |   |                                                                                     |                                                                                     |               |     |                                                                                      |                       |      |                                                                                       |                    |        |     |                                                                                       |
|----|---|-------------------------------------------------------------------------------------|-------------------------------------------------------------------------------------|---------------|-----|--------------------------------------------------------------------------------------|-----------------------|------|---------------------------------------------------------------------------------------|--------------------|--------|-----|---------------------------------------------------------------------------------------|
| 25 | 0 |     |     | (7+7)<br>7    | 35  |     | (1+1)<br>1            | 5    |     | (109+71)<br>90     | 450    | 288 |     |
| 26 | 0 |    |    | (17+19)<br>18 | 90  |    | (353+36)<br>1)<br>357 | 1785 |    | (78+110)<br>94     | 470    | 285 |    |
| 27 | 0 |    |    | (23+25)<br>24 | 120 |   | (300+28)<br>2)<br>291 | 1455 |    | (426+434)<br>430   | 2150   | 366 |    |
| 28 | 0 |  |  | (25+29)<br>27 | 135 |  | (14+10)<br>12         | 60   |  | (367+358)<br>362   | 1810   | 302 |  |
| 29 | 0 |  |  | (85+63)<br>74 | 370 |  | (148+98)<br>123       | 615  |  | (320+329)<br>324,5 | 1622,5 | 315 |  |

|    |   |                                                                                     |                                                                                                                                                                            |                      |      |                                                                                                                                                                              |                       |      |                                                                                                                                                                                |               |      |     |                                                                                       |
|----|---|-------------------------------------------------------------------------------------|----------------------------------------------------------------------------------------------------------------------------------------------------------------------------|----------------------|------|------------------------------------------------------------------------------------------------------------------------------------------------------------------------------|-----------------------|------|--------------------------------------------------------------------------------------------------------------------------------------------------------------------------------|---------------|------|-----|---------------------------------------------------------------------------------------|
|    |   |                                                                                     | 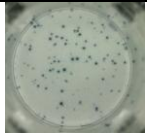                                                                                           |                      |      |                                                                                             |                       |      |                                                                                              |               |      |     |                                                                                       |
| 30 | 0 |    | <br>     | (19+13)<br>16        | 80   | <br>     | (365+36)<br>1)<br>363 | 1815 | <br>     | (0+2)<br>1    | 5    | 338 |    |
| 31 | 0 |    | <br>     | (1+1)<br>1           | 5    | <br>     | (264+30)<br>6)<br>285 | 1425 | <br>     | (3+4)<br>3,5  | 17,5 | 321 |    |
| 32 | 0 |    | <br>    | (303+2<br>15)<br>259 | 1295 | <br>    | (5+7)<br>6            | 30   | <br>    | (25+27)<br>26 | 130  | 281 |   |
| 33 | 0 |  | <br> | (270+2<br>90)<br>280 | 1400 | <br> | (48+38)<br>43         | 215  | <br> | (34+40)<br>37 | 185  | 290 |  |

|    |   |                                                                                     |                                                                                                                                                                            |                      |      |                                                                                                                                                                              |                        |      |                                                                                                                                                                                |                  |      |     |                                                                                       |
|----|---|-------------------------------------------------------------------------------------|----------------------------------------------------------------------------------------------------------------------------------------------------------------------------|----------------------|------|------------------------------------------------------------------------------------------------------------------------------------------------------------------------------|------------------------|------|--------------------------------------------------------------------------------------------------------------------------------------------------------------------------------|------------------|------|-----|---------------------------------------------------------------------------------------|
| 34 | 0 |     | <br>      | (250+2<br>14)<br>232 | 1160 | <br>      | (57+48)<br>52          | 260  | <br>      | (377+423)<br>400 | 2000 | 327 |     |
| 35 | 0 |    | <br>     | (194+3<br>04)<br>249 | 1245 | <br>     | (84+98)<br>91          | 455  | <br>     | (427+415)<br>421 | 2105 | 342 |    |
| 36 | 2 |    | <br>     | (10+6)<br>8          | 40   | <br>     | (98+90)<br>92          | 460  | <br>     | (287+303)<br>287 | 1435 | 298 |    |
| 37 | 0 |  | <br> | (34+38<br>)<br>36    | 180  | <br> | (36+22)<br>29          | 145  | <br> | (69+61)<br>65    | 325  | 289 |  |
| 38 | 0 |  |                                                                                         | (36+52<br>)<br>44    | 220  |                                                                                          | (196+24<br>6)<br>221,6 | 1108 |                                                                                           | (99+87)<br>93    | 465  | 279 |  |

|    |   |                                                                                     |                                                                                                                                                                            |                    |       |                                                                                                                                                                              |                  |      |                                                                                                                                                                                |                  |      |                                                                     |                                                                                       |
|----|---|-------------------------------------------------------------------------------------|----------------------------------------------------------------------------------------------------------------------------------------------------------------------------|--------------------|-------|------------------------------------------------------------------------------------------------------------------------------------------------------------------------------|------------------|------|--------------------------------------------------------------------------------------------------------------------------------------------------------------------------------|------------------|------|---------------------------------------------------------------------|---------------------------------------------------------------------------------------|
|    |   |                                                                                     | 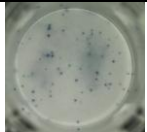                                                                                           |                    |       |                                                                                             |                  |      |                                                                                              |                  |      |                                                                     |                                                                                       |
| 39 | 4 |    | <br>     | (137+159)<br>148   | 740   | <br>     | (360+350)<br>351 | 1755 | <br>     | (124+80)<br>98   | 490  | 310                                                                 |    |
| 40 | 0 |    | <br>     | (256+109)<br>182,5 | 912,5 | <br>     | (250+316)<br>283 | 1415 | <br>     | (133+109)<br>121 | 605  | The number of spots is over the maximum number of detectable spots. |    |
| 41 | 0 |    | <br>    | (6+10)<br>8        | 40    | <br>    | (256+246)<br>251 | 1255 | <br>    | (138+122)<br>130 | 650  | 287                                                                 |    |
| 42 | 0 |  | <br> | (260+262)<br>261   | 1305  | <br> | (1+3)<br>2       | 10   | <br> | (430+424)<br>427 | 2135 | 291                                                                 |  |



|    |   |                                                                                     |                                                                                                                                                                            |                        |        |                                                                                                                                                                              |               |     |                                                                                                                                                                                |                  |      |     |                                                                                       |
|----|---|-------------------------------------------------------------------------------------|----------------------------------------------------------------------------------------------------------------------------------------------------------------------------|------------------------|--------|------------------------------------------------------------------------------------------------------------------------------------------------------------------------------|---------------|-----|--------------------------------------------------------------------------------------------------------------------------------------------------------------------------------|------------------|------|-----|---------------------------------------------------------------------------------------|
| 43 | 0 |     | <br>      | (184+2<br>51)<br>237,5 | 1187,5 | <br>      | (31+23)<br>27 | 135 | <br>      | (352+400)<br>376 | 1880 | 287 |     |
| 44 | 0 |    | <br>     | (2+4)<br>3             | 15     | <br>     | (32+38)<br>35 | 175 | <br>     | (2+0)<br>1       | 5    | 302 |    |
| 45 | 0 |    | <br>     | (12+12<br>)<br>12      | 60     | <br>     | (45+55)<br>50 | 250 | <br>     | (13+11)<br>12    | 60   | 290 |    |
| 46 | 0 |  | <br> | (20+26<br>)<br>23      | 115    | <br> | (72+72)<br>72 | 360 | <br> | (54+42)<br>48    | 240  | 285 |  |
| 47 | 0 |  |                                                                                         | (41+49<br>)<br>45      | 225    |                                                                                          | (80+86)<br>83 | 415 |                                                                                           | (62+70)<br>66    | 330  | 349 |  |



|    |   |                                                                                     |                                                                                                                                                                            |                      |      |                                                                                                                                                                              |                        |      |                                                                                                                                                                                |                  |      |     |                                                                                       |
|----|---|-------------------------------------------------------------------------------------|----------------------------------------------------------------------------------------------------------------------------------------------------------------------------|----------------------|------|------------------------------------------------------------------------------------------------------------------------------------------------------------------------------|------------------------|------|--------------------------------------------------------------------------------------------------------------------------------------------------------------------------------|------------------|------|-----|---------------------------------------------------------------------------------------|
|    |   |                                                                                     | 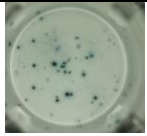                                                                                           |                      |      |                                                                                             |                        |      |                                                                                              |                  |      |     |                                                                                       |
| 48 | 0 |    | <br>     | (114+7<br>4)<br>94   | 470  | <br>     | (143+15<br>1)<br>146,8 | 734  | <br>     | (395+427)<br>411 | 2055 | 296 |    |
| 49 | 0 |    | <br>     | (138+2<br>68)<br>203 | 1015 | <br>     | (180+18<br>4)<br>182   | 910  | <br>     | (115+67)<br>91   | 455  | 275 |    |
| 50 | 0 |    | <br>    | (223+2<br>23)<br>223 | 1115 | <br>    | (352+32<br>8)<br>340   | 1700 | <br>    | (116+102)<br>109 | 545  | 280 |    |
| 51 | 0 |  | <br> | (201+3<br>19)<br>260 | 1300 | <br> | (299+30<br>1)<br>300   | 1500 | <br> | (334+356)<br>345 | 1725 | 301 |  |

|    |   |                                                                                     |                                                                                     |                      |      |                                                                                      |                      |      |                                                                                       |                    |        |     |                                                                                       |
|----|---|-------------------------------------------------------------------------------------|-------------------------------------------------------------------------------------|----------------------|------|--------------------------------------------------------------------------------------|----------------------|------|---------------------------------------------------------------------------------------|--------------------|--------|-----|---------------------------------------------------------------------------------------|
| 52 | 0 |     |     | (290+1<br>92)<br>241 | 1205 |     | (6+4)<br>5           | 25   |     | (7+3)<br>5         | 25     | 325 |     |
| 53 | 0 |    |    | (8+4)<br>6           | 30   |    | (18+11)<br>14,5      | 72,5 |    | (14+26)<br>20      | 100    | 341 |    |
| 54 | 0 |    |    | (9+9)<br>9           | 45   |   | (39+31)<br>35        | 175  |    | (50+58)<br>54      | 270    | 345 |    |
| 55 | 0 |  |  | (35+43<br>)<br>39    | 195  |  | (321+32<br>1)<br>321 | 1605 |  | (399+380)<br>389,5 | 1947,5 | 198 |  |

|    |   |                                                                                     |                                                                                                                                                                            |                  |      |                                                                                                                                                                              |                  |      |                                                                                                                                                                                |                  |      |     |                                                                                       |
|----|---|-------------------------------------------------------------------------------------|----------------------------------------------------------------------------------------------------------------------------------------------------------------------------|------------------|------|------------------------------------------------------------------------------------------------------------------------------------------------------------------------------|------------------|------|--------------------------------------------------------------------------------------------------------------------------------------------------------------------------------|------------------|------|-----|---------------------------------------------------------------------------------------|
| 56 | 0 |     | <br>      | (58+56)<br>57    | 285  | <br>      | (303+301)<br>302 | 1510 | <br>      | (338+322)<br>330 | 1650 | 297 |     |
| 57 | 0 |    | <br>     | (268+242)<br>255 | 1275 | <br>     | (9+7)<br>8       | 40   | <br>     | (160+140)<br>150 | 750  | 285 |    |
| 58 | 0 |    | <br>     | (320+186)<br>253 | 1265 | <br>     | (46+38)<br>42    | 210  | <br>     | (207+195)<br>198 | 990  | 263 |    |
| 59 | 0 |  | <br> | (23+15)<br>19    | 95   | <br> | (66+64)<br>65    | 325  | <br> | (244+242)<br>243 | 1215 | 302 |  |
| 60 | 0 |  |                                                                                         | (30+32)<br>31    | 155  |                                                                                          | (58+64)<br>61    | 305  |                                                                                           | (100+76)<br>88   | 440  | 316 |  |

|    |   |                                                                                     |                                                                                                                                                                            |                  |       |                                                                                                                                                                              |                  |      |                                                                                                                                                                                |                  |     |     |                                                                                       |
|----|---|-------------------------------------------------------------------------------------|----------------------------------------------------------------------------------------------------------------------------------------------------------------------------|------------------|-------|------------------------------------------------------------------------------------------------------------------------------------------------------------------------------|------------------|------|--------------------------------------------------------------------------------------------------------------------------------------------------------------------------------|------------------|-----|-----|---------------------------------------------------------------------------------------|
|    |   |                                                                                     | 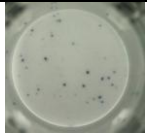                                                                                           |                  |       |                                                                                             |                  |      |                                                                                              |                  |     |     |                                                                                       |
| 61 | 0 |    | <br>     | (80+97)<br>88,5  | 442,5 | <br>     | (82+88)<br>85    | 425  | <br>     | (79+77)<br>78    | 390 | 275 |    |
| 62 | 0 |    | <br>     | (108+328)<br>218 | 1090  | <br>     | (194+210)<br>202 | 1010 | <br>     | (76+68)<br>72    | 360 | 268 |    |
| 63 | 0 |    | <br>    | (224+248)<br>224 | 1120  | <br>    | (309+305)<br>307 | 1535 | <br>    | (103+79)<br>91   | 455 | 289 |    |
| 64 | 0 |  | <br> | (108+212)<br>160 | 800   | <br> | (8+14)<br>11     | 55   | <br> | (145+163)<br>154 | 770 | 275 |  |



|    |   |                                                                                     |                                                                                     |                  |      |                                                                                      |                       |       |                                                                                       |                  |       |     |                                                                                       |
|----|---|-------------------------------------------------------------------------------------|-------------------------------------------------------------------------------------|------------------|------|--------------------------------------------------------------------------------------|-----------------------|-------|---------------------------------------------------------------------------------------|------------------|-------|-----|---------------------------------------------------------------------------------------|
| 65 | 0 |     |     | (22+22)<br>22    | 110  |     | (233+34)<br>5)<br>289 | 1445  |     | (221+203)<br>212 | 1060  | 273 |     |
| 66 | 0 |    |    | (15+37)<br>26    | 130  |    | (254+28)<br>6)<br>260 | 1300  |    | (246+256)<br>251 | 1255  | 289 |    |
| 67 | 0 |    |    | (55+55)<br>55    | 275  |   | (20+21)<br>20,5       | 102,5 |    | (115+215)<br>165 | 825   | 286 |    |
| 68 | 0 |  |  | (247+261)<br>254 | 1270 |  | (23+33)<br>28         | 140   |  | (91+96)<br>93,5  | 467,5 | 309 |  |
| 69 | 0 |  |  | (20+26)<br>23    | 115  |  | (68+88)<br>78         | 390   |  | (95+73)<br>84    | 420   | 312 |  |



|    |   |                                                                                     |                                                                                                                                                                            |                  |     |                                                                                                                                                                              |                  |     |                                                                                                                                                                                |                  |      |     |                                                                                       |
|----|---|-------------------------------------------------------------------------------------|----------------------------------------------------------------------------------------------------------------------------------------------------------------------------|------------------|-----|------------------------------------------------------------------------------------------------------------------------------------------------------------------------------|------------------|-----|--------------------------------------------------------------------------------------------------------------------------------------------------------------------------------|------------------|------|-----|---------------------------------------------------------------------------------------|
|    |   |                                                                                     | 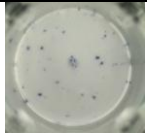                                                                                           |                  |     |                                                                                             |                  |     |                                                                                              |                  |      |     |                                                                                       |
| 70 | 0 |    | <br>     | (55+65)<br>60    | 300 | <br>     | (94+90)<br>92    | 460 | <br>     | (117+147)<br>132 | 660  | 386 |    |
| 71 | 2 |    | <br>     | (112+92)<br>102  | 510 | <br>     | (85+65)<br>73    | 365 | <br>     | (157+199)<br>176 | 880  | 365 |    |
| 72 | 0 |    | <br>    | (124+232)<br>178 | 890 | <br>    | (139+95)<br>119  | 595 | <br>    | (267+285)<br>276 | 1380 | 237 |    |
| 73 | 0 |  | <br> | (75+305)<br>190  | 950 | <br> | (178+140)<br>159 | 795 | <br> | (82+70)<br>76    | 380  | 304 |  |
